# Supplementary material for: Dual second harmonic generation and up-conversion photoluminescence emission in highly-optimized LiNbO3 nanocrystals doped and co-doped with Er3+ and Yb3+
Source: Royal Society of Chemistry journal article supplement (doi:10.1039/d4nr00431k), 2024-01-01
Supplement: d4nr00431k1.pdf [file d4nr00431k1.pdf]

## Electronic Supplementary Information

### Dual Second Harmonic Generation and Up-Conversion Photoluminescence Emission in Highly-Optimized LiNbO<sub>3</sub> Nanocrystals Doped and Co-Doped with Er<sup>3+</sup> and Yb<sup>3+</sup>

K. Bredillet, F. Riporto, T. Guo, A. Dhouib, V. Multian, V. Monnier, P. Figueras Llussà, S. Beauquis, L. Bonacina, Y. Mugnier, R. Le Dantec

**Table S1** Summary table of the variable amounts of precursors used to prepare the set 1 of Er-doped samples with a varying molar concentration ranging from 1 to 6 mol %. The volume of niobium ethoxide is 308  $\mu$ L for each synthesis and the total volume is adjusted at 10.3 mL with ethanol. The experimental content of Er derived from ICP-AES analysis is overall consistent with the theoretical one with the exception of only one value indicated in bold. The cell parameters and apparent crystallite sizes estimated along the [012], [110] and [006] directions from Le Bail refinements are also provided.

| Sample name                        | Er0%<br>LN178 | Er1%<br>LN215 | Er2%<br>LN216 | Er3%<br>LN217 | Er4%<br>LN218 | Er5%<br>LN219 | Er6%<br>LN220         |
|------------------------------------|---------------|---------------|---------------|---------------|---------------|---------------|-----------------------|
| Lithium ethoxide volume ( $\mu$ L) | 1200          | 1164          | 1128          | 1092          | 1056          | 1020          | 984                   |
| Erbium isopropoxide Mass (mg)      | 0             | 4.1           | 8.2           | 12.3          | 16.4          | 20.5          | 24.6                  |
| mol % of Er from ICP-AES           | 0             | 0.6           | 2.2           | 2.4           | <b>2.3</b>    | 4.0           | 5.7<br>Not phase pure |
| Size [012] (nm)                    | 21            | 24            | 19            | 19            | 16            | 18            | 15                    |
| Size [110] (nm)                    | 45            | 45            | 31            | 31            | 23            | 27            | 18                    |
| Size [006] (nm)                    | 14            | 17            | 14            | 14            | 13            | 14            | 14                    |
| A ( $\text{\AA}$ )                 | 5.14507(5)    | 5.14554(5)    | 5.1469(1)     | 5.14696(6)    | 5.14527(7)    | 5.14670(6)    | 5.14309(9)            |
| c ( $\text{\AA}$ )                 | 13.8868(2)    | 13.8913(2)    | 13.8903(3)    | 13.8939(3)    | 13.8899(3)    | 13.8875(3)    | 13.8955(3)            |

**Table S2** Summary table of the variable amounts of precursors used to prepare the set 2 of Er-doped samples with a varying molar concentration ranging from 1 to 6 mol %. The volume of niobium ethoxide is 308  $\mu\text{L}$  for each synthesis and the total volume is adjusted at 10.3 mL with ethanol. The experimental content of Er derived from ICP-AES analysis is overall consistent with the theoretical one with the exception of only one value indicated in bold. The cell parameters and apparent crystallite sizes estimated along the [012], [110] and [006] directions from Le Bail refinements are also provided.

| Sample name                               | Er1%<br>LN204 | Er2.5%<br>LN207 | Er3%<br>LN196 | Er4%<br>LN198 | Er6%<br>LN201 |
|-------------------------------------------|---------------|-----------------|---------------|---------------|---------------|
| Lithium ethoxide volume ( $\mu\text{L}$ ) | 1164          | 1128            | 1092          | 1056          | 984           |
| Erbium isopropoxide Mass (mg)             | 4.1           | 8.2             | 12.3          | 16.4          | 24.6          |
| mol % of Er from ICP-AES                  | 1.0           | <b>0.6</b>      | 2.8           | 3.8           | 5.2           |
| Size [012] (nm)                           | 18            | 17              | 22            | 19            | 16            |
| Size [110] (nm)                           | 30            | 22              | 38            | 29            | 20            |
| Size [006] (nm)                           | 14            | 14              | 16            | 14            | 13            |
| A ( $\text{\AA}$ )                        | 5.14616(8)    | 5.14209(8)      | 5.14605(5)    | 5.14811(5)    | 5.1445(1)     |
| c ( $\text{\AA}$ )                        | 13.8933(4)    | 13.8902(3)      | 13.8895(2)    | 13.8831(2)    | 13.8939(4)    |

**Table S3** Summary table of the variable amounts of precursors used to prepare Er/Yb co-doped samples with a varying molar concentration of lanthanide ions ranging from 2.4 to 8.4 mol %. The volume of niobium ethoxide is 308  $\mu\text{L}$  for each synthesis and the total volume is adjusted at 10.3 mL with ethanol. The experimental molar content of Er and Yb derived from ICP-AES analysis is also indicated together with the cell parameters and apparent crystallite sizes estimated along the [012], [110] and [006] directions from Le Bail refinements (only for phase-pure samples)

| Sample name                               | Er0,4%-<br>Yb2%<br>LN108 | Er0,6%-<br>Yb3%<br>LN98 | Er0,8%-<br>Yb4%<br>LN131 | Er1,0%-<br>Yb5%<br>LN154 | Er1,2%-<br>Yb6%<br>LN144 | Er1,4%-<br>Yb7%<br>LN145    | Er3%-<br>Yb3%<br>LN152 |
|-------------------------------------------|--------------------------|-------------------------|--------------------------|--------------------------|--------------------------|-----------------------------|------------------------|
| Lithium Ethoxide Volume ( $\mu\text{L}$ ) | 1110                     | 1070                    | 1030                     | 985                      | 941                      | 898                         | 985                    |
| Erbium Isopropoxide Mass                  | 1,65mg                   | 2,5mg                   | 3,3mg                    | 4,1mg                    | 4,9mg                    | 5,7mg                       | 12,3mg                 |
| Ytterbium Isopropoxide Mass               | 8,4mg                    | 12,6mg                  | 16,8mg                   | 21mg                     | 25,2mg                   | 29,4mg                      | 12,6mg                 |
| mol % of (Er/Yb) from ICP-AES             | (0.5/2.0)                | (1.1/2.3)               | (1.0/4.0)                | (0.3/4.4)                | Not phase pure           | (0.9/7.3)<br>Not phase pure | (2.9/2.5)              |
| Size [012] (nm)                           | 18                       | 15                      | 16                       | 15                       |                          |                             | 16                     |
| Size [110] (nm)                           | 30                       | 24                      | 23                       | 22                       |                          |                             | 23                     |
| Size [006] (nm)                           | 13                       | 11                      | 13                       | 12                       |                          |                             | 12                     |
| A ( $\text{\AA}$ )                        | 5.14811(7)               | 5.1496(1)               | 5.14919(6)               | 5.14651(9)               |                          |                             | 5.1472(4)              |
| c ( $\text{\AA}$ )                        | 13.8939(3)               | 13.8997(3)              | 13.8925(2)               | 13.8927(4)               |                          |                             | 13.8969(3)             |

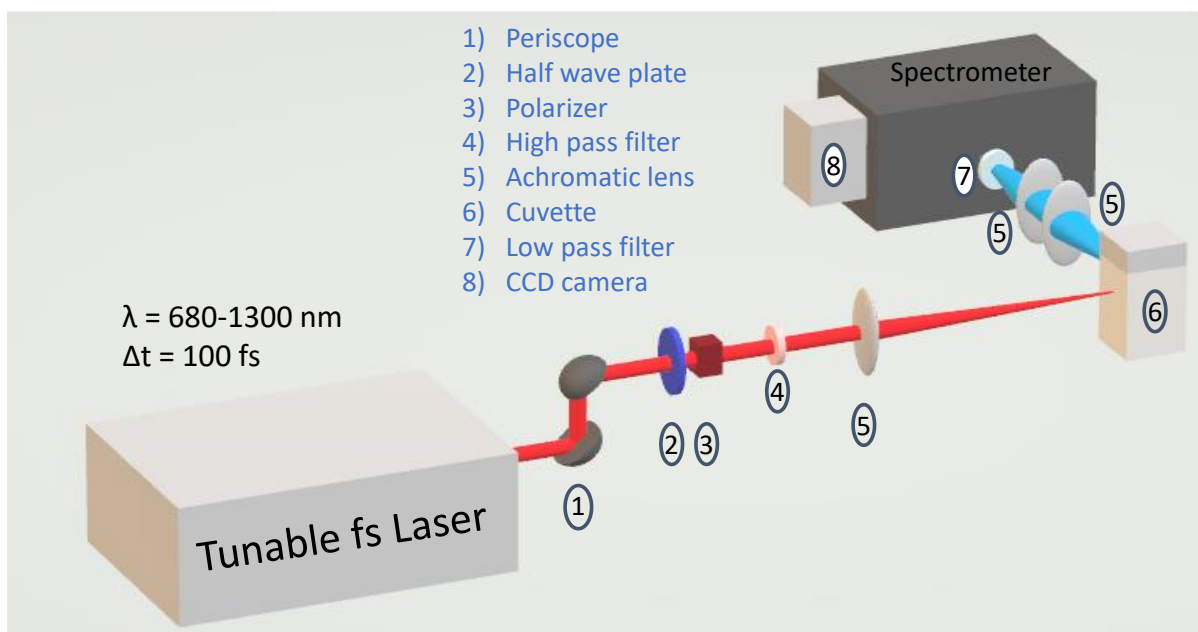

**Fig. S1** Scheme of the optical setup used for second harmonic scattering and up-conversion photoluminescence measurements.

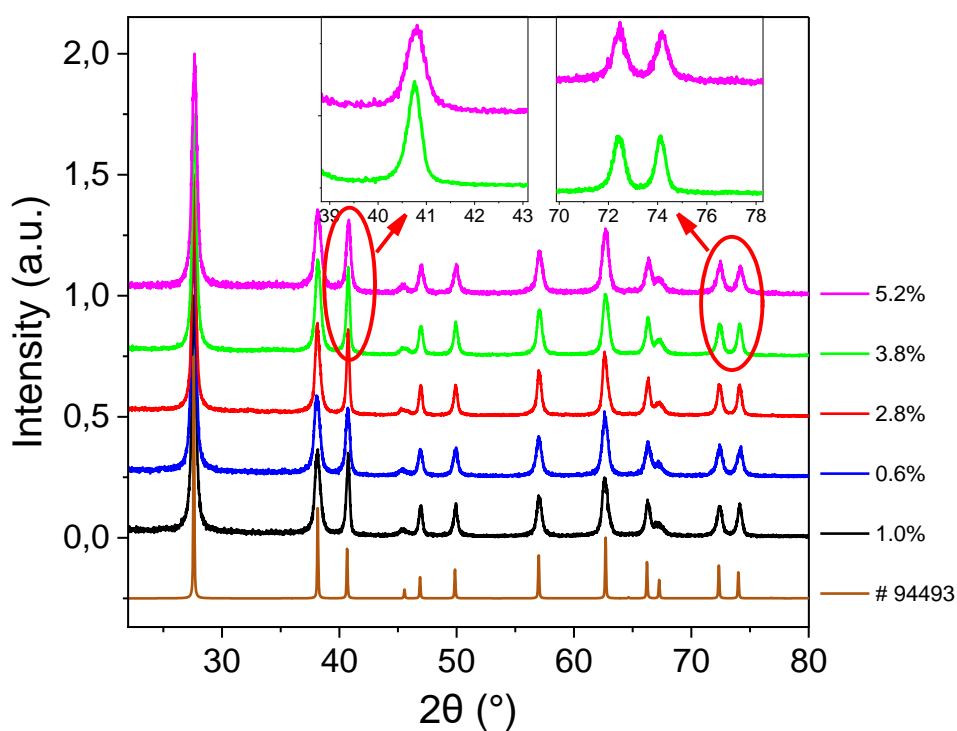

**Fig. S2** X-Ray diffraction profiles of the second series of samples of Table S2 showing the absence of any phase impurity till the highest content of Er measured at 5.2 mol %.

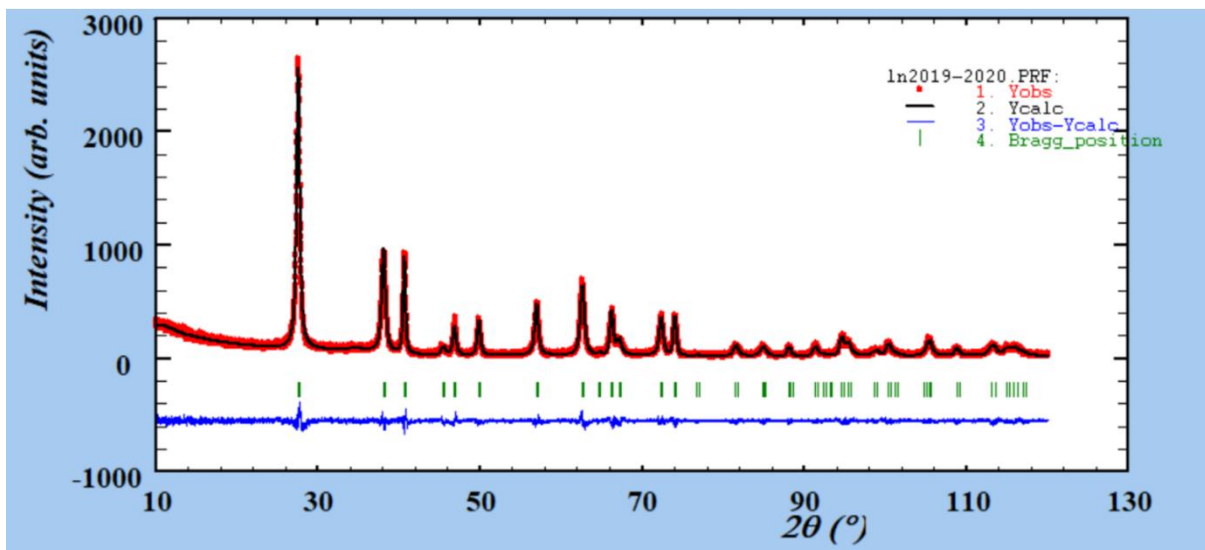

**Fig. S3** Example of Le Bail fit refinement for LN nanocrystals doped with 4 mol % of  $\text{Er}^{3+}$  resulting in a global  $\chi^2$  value at 1.47 and the apparent crystallite sizes and cell parameters mentioned in Table S1.

### Representative TEM images and associated size distributions for the doped and co-doped samples

#### LN 215, 0.6 mol % of Er

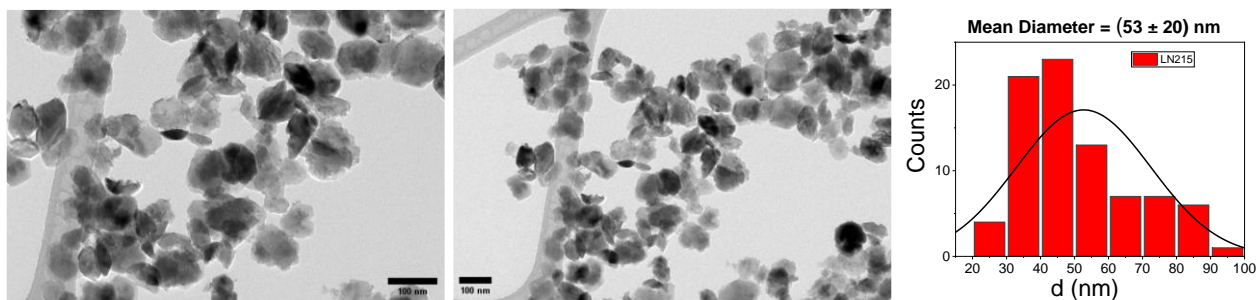

#### LN 219, 4 mol % of Er

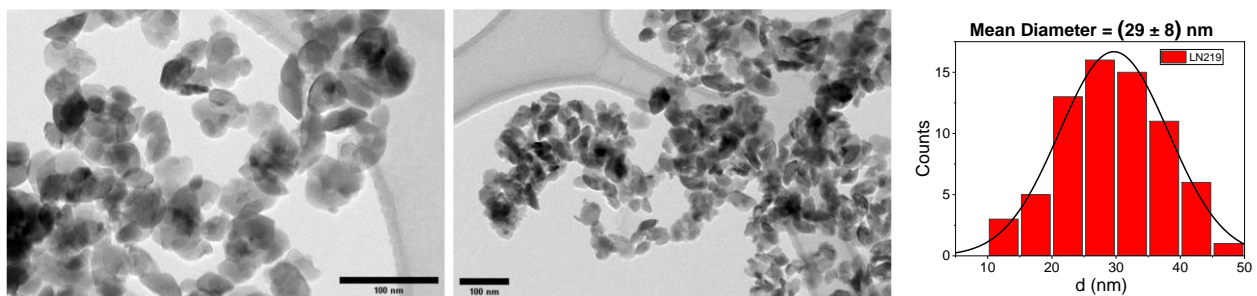

**LN 198, 3.8 mol % of Er**

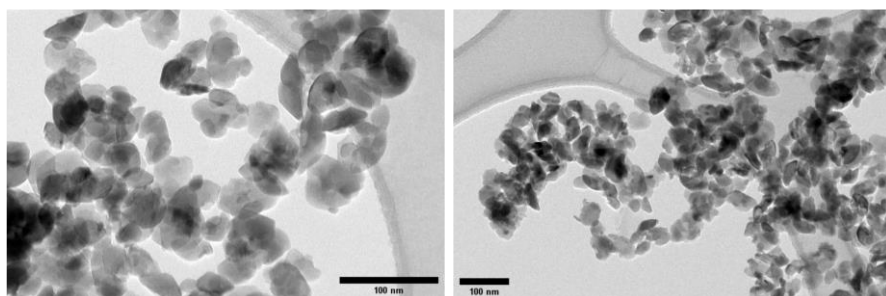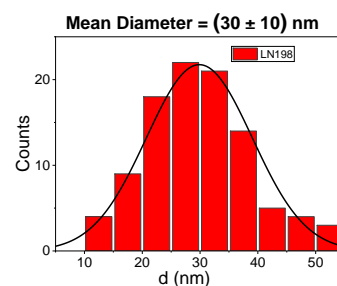

**LN 131, 1.0 mol % of Er and 4.0 mol % of Yb**

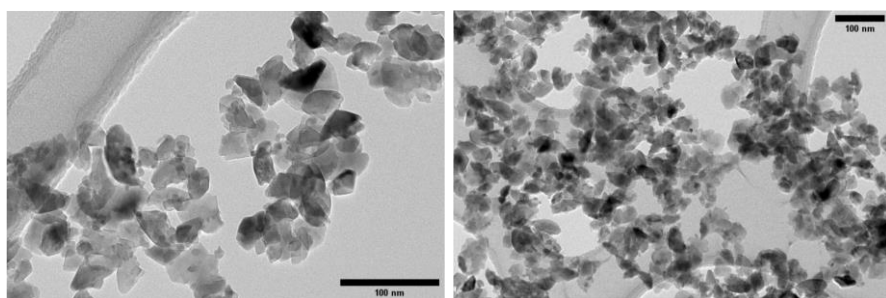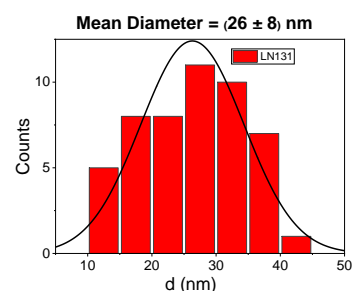

**LN 152, 2.9 mol % of Er and 2.5 mol % of Yb**

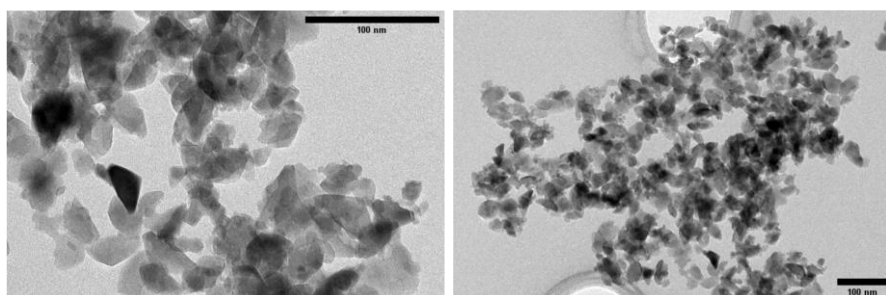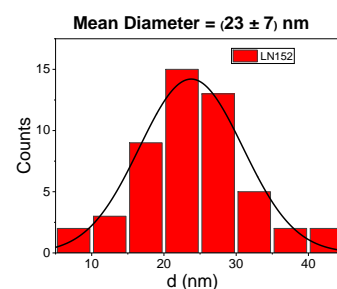

**Fig. S4** Representative TEM images of the main samples of interest and corresponding size distributions obtained from 50-100 individual nanocrystals. Note that, with the exception of sample LN215 (0.6 mol % of Er), the mean size is always at about 25-30 nm and with a standard deviation below 10 nm. The mean sizes are very consistent with the ones obtained in Tables S1-S3 from Le Bail refinements since a given size distribution is to be considered along each  $[hkl]$  direction.

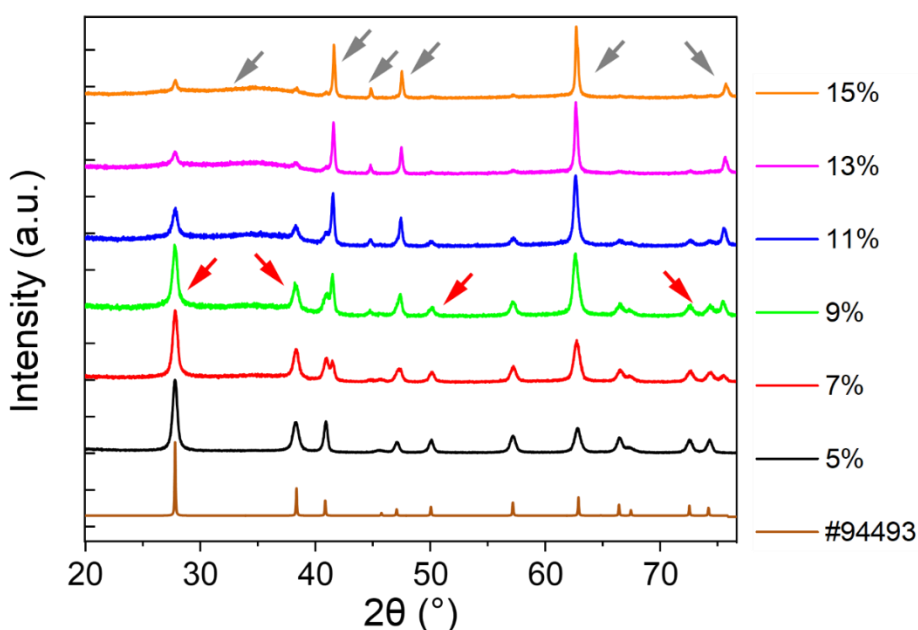

**Fig. S5** X-Ray diffraction profiles of powders prepared with an increasing theoretical erbium content varying from 5 mol % to 15 mol %. Red arrows indicate the progressive disappearance of some broad reflections associated with LN nanocrystals while grey arrows correspond to new, thinner diffraction peaks of a supposedly Nb-rich phase and to an increasing background around 35° in  $2\theta$ .

## Up-conversion mechanisms leading to the photoluminescence emission when excited at 800 nm and 980 nm

### 800 nm excitation

Various mechanisms can be involved to populate the  $^2H_{11/2}$  and  $^4S_{3/2}$  emitting levels, which are responsible for the emissions at 525 and 550 nm, respectively (Fig. S6). A first ground state absorption (GSA) allows excitation of the  $^4I_{9/2}$  state ( $12500\text{ cm}^{-1}$ ). As recently discussed,<sup>1</sup> two mechanisms either based on excited state absorption (ESA) or on cross-relaxation by Energy Transfer (ET) between two neighbouring  $\text{Er}^{3+}$  ions, can lead to the green UC-PL signals. For the ESA hypothesis, a non-radiative de-excitation occurs between  $^4I_{9/2}$  and  $^4I_{11/2}$  before a second absorption. Levels  $^4F_{3/2}$  and  $^4F_{5/2}$  are then populated (as described by ESA 1 in Fig. S6) before new non-radiative de-excitations towards the  $^2H_{11/2}$  and  $^4S_{3/2}$  levels. Another possibility is the ESA 2 mechanism implying non-radiative de-excitations from  $^4I_{9/2}$  to  $^4I_{11/2}$  and to  $^4I_{13/2}$  after the initial GSA. The second absorption then corresponds to  $^4I_{13/2} \rightarrow ^2H_{11/2}$  and again involves only one  $\text{Er}^{3+}$  ion. Conversely, two nearby  $\text{Er}^{3+}$  ions can interact through two different ET mechanisms. The first one, denoted as ET 1, can be described as  $^4I_{11/2} + ^4I_{11/2} \rightarrow ^4F_{7/2} + ^4I_{15/2}$  and is followed by a non-radiative de-excitation from  $^4F_{7/2}$  to the  $^2H_{11/2}$  and  $^4S_{3/2}$  emitting levels. The second energy transfer is labelled as ET 2 and corresponds to  $^4I_{11/2} + ^4I_{13/2} \rightarrow ^2H_{11/2} + ^4I_{15/2}$ .

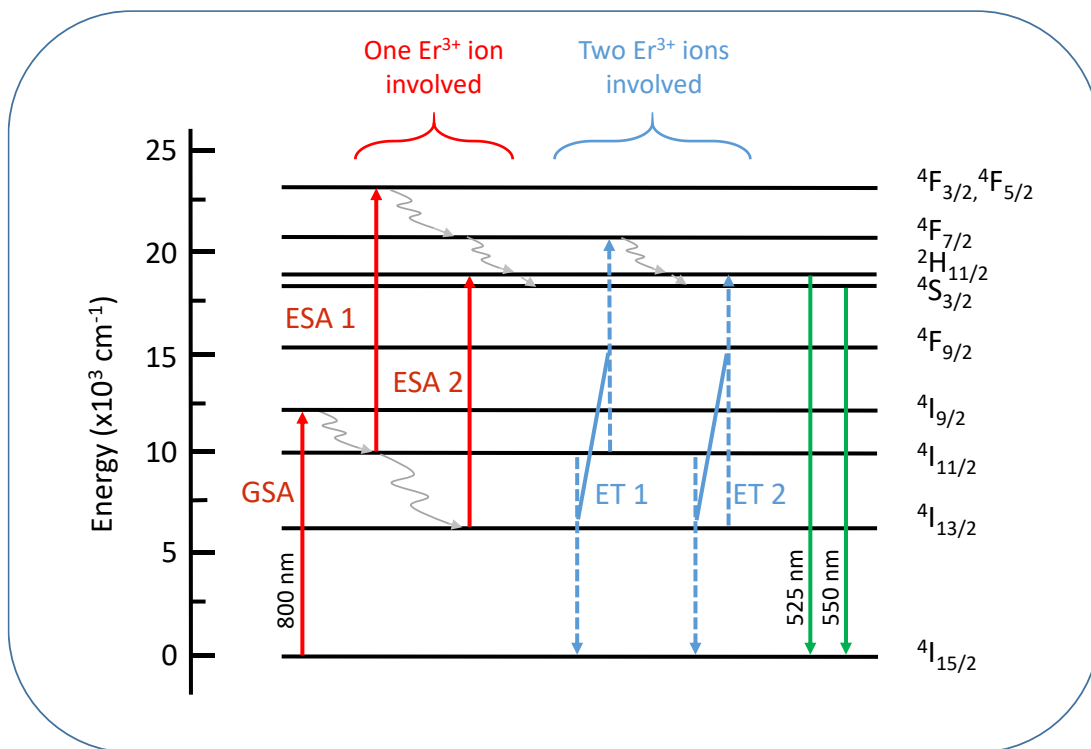

**Fig. S6** Energy level diagram of the possible up-conversion processes leading to the green photoluminescence emissions at 525 and 550 nm when excited at 800 nm.

980 nm excitation

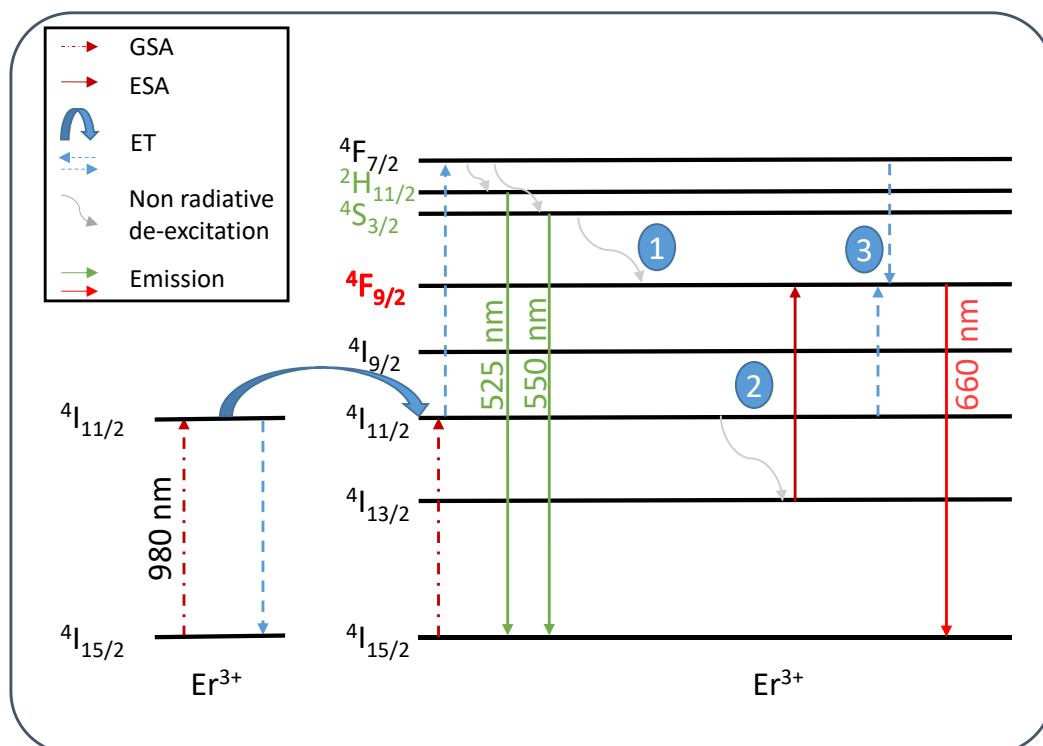

**Fig. S7** Energy level diagram of the up-conversion processes leading to the green and red photoluminescence emissions at 525, 550 and 660 nm when excited at 980 nm.



With the excitation set at 980 nm, the green and red emitting levels can be populated by well-documented up-conversion processes.<sup>2-4</sup> After the initial GSA (Fig S7), the  $^4F_{7/2}$  excited state of the emitting  $Er^{3+}$  ion is either populated by ESA or ET from another nearby erbium ion. In both cases, non-radiative de-excitations occur between  $^4F_{7/2}$  and the  $^2H_{11/2}$  and  $^4S_{3/2}$  green emitting levels.

Regarding the red UC-PL emission, three hypotheses labelled as 1, 2 and 3 in Fig S7 can be put forward. The first is based on non-radiative de-excitation from the  $^4S_{3/2}$  state to the  $^4F_{9/2}$  emitting level. The second suggests that a non-radiative de-excitation takes place between  $^4I_{11/2}$  and  $^4I_{13/2}$  before excitation of the  $^4F_{9/2}$  state from ESA. Finally, the last involves the excited states of two different erbium ions, namely  $^4I_{11/2}$  and  $^4F_{7/2}$ , after absorption of one and two photons, respectively. The energy transfer  $^4I_{11/2} + ^4F_{7/2} \rightarrow 2 ^4F_{9/2}$  is then postulated to explain population of the red emitting level.

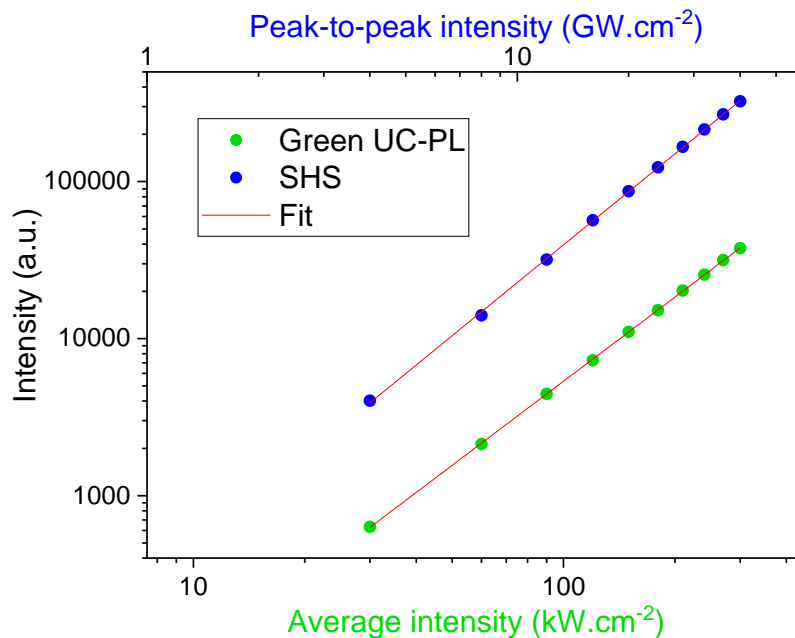

**Fig. S8** LN:4.0%Er<sup>3+</sup> power law dependences excited at 800 nm corresponding to the SHG (blue dots, 400 nm) and UC-PL emissions (green dots, 525 and 550 nm). Data are plotted in log-log scale and the linear fits (red lines) are performed using the function  $y=A.x^n$  with  $n$  the non-linear free index experimentally derived for each optical process.

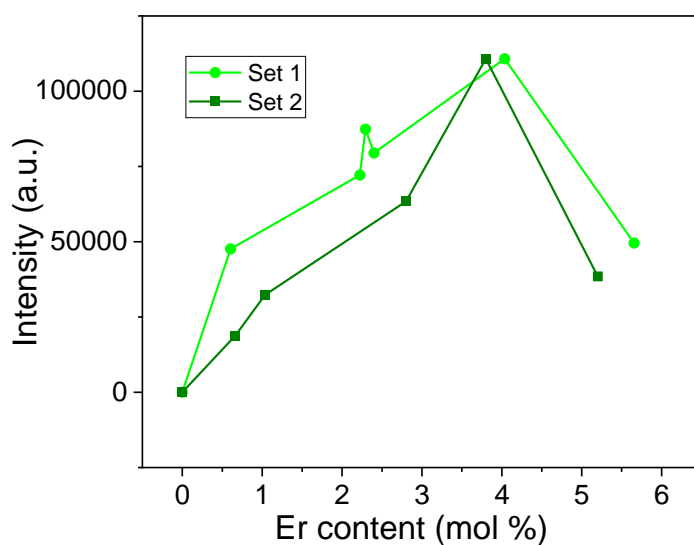

**Fig. S9** Comparison between the green UC-PL intensities measured from nanocrystal suspensions prepared from for the two different sets of samples and for which the experimental molar concentration in erbium is summarized above in Tables S1 and S2.

### Up-conversion mechanisms leading to the green and red photoluminescence emissions in $\text{Er}^{3+}/\text{Yb}^{3+}$ co-doped $\text{LiNbO}_3$ nanocrystals when excited at 980 nm

#### Energy transfer (ET) between $\text{Yb}^{3+}$ and $\text{Er}^{3+}$

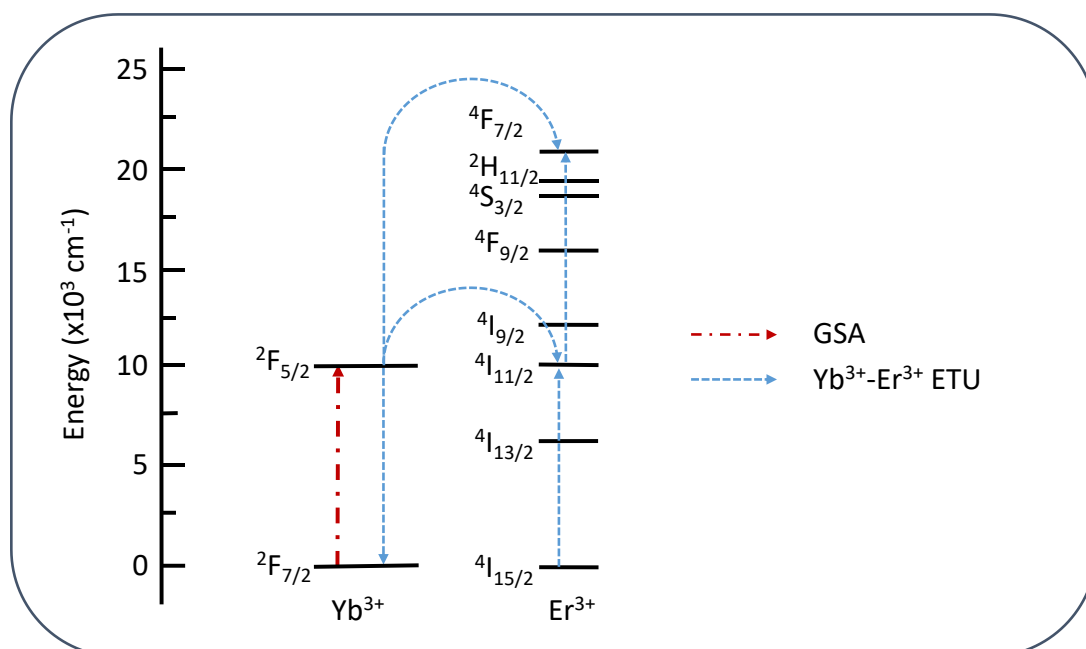

**Fig. S10** Energy transfer up-conversion for  $\text{Yb}^{3+}$ - $\text{Er}^{3+}$  couple

Ytterbium ions are added to the structure for their high effective absorption cross-section at 980 nm. They enable the absorption process to be enhanced and then transfer their

energy to neighbouring erbium ions. This is made possible by the very close energy levels  $^2F_{5/2}$  of ytterbium and  $^4I_{11/2}$  of erbium (around  $10\,000\text{ cm}^{-1}$ ). The up-conversion mechanisms leading to green and red photoluminescence emissions are then similar to those presented for erbium-doped particles.

### **XRD phase purity of co-doped LN nanocrystals as a function of the total concentration of $\text{Er}^{3+}$ and $\text{Yb}^{3+}$ ions.**

As discussed in the main text for Er-doped samples, the doping limit is also investigated for Er/Yb co-doped nanocrystals prepared from a varying molar concentration of lanthanide ions ranging from 2.4 to 8.4 mol %. The Yb/Er ratio is here fixed in Fig S11 at 5. Given that both Er and Yb ions enter the LN host near the lithium site, the total concentration in lanthanide ions is to be considered as already outlined in bulk crystals.<sup>5</sup> In good agreement with the XRD characterizations of the Er mono-doped samples illustrated in Fig 1a, the same impurity phase and apparition of a significant background are evidenced in Fig S11 when the total dopant content exceeds 6 mol %. The doping limit for XRD phase-pure co-doped nanocrystals is thus again found at about 5 mol % according to the chemical analyses provided in Table S3.

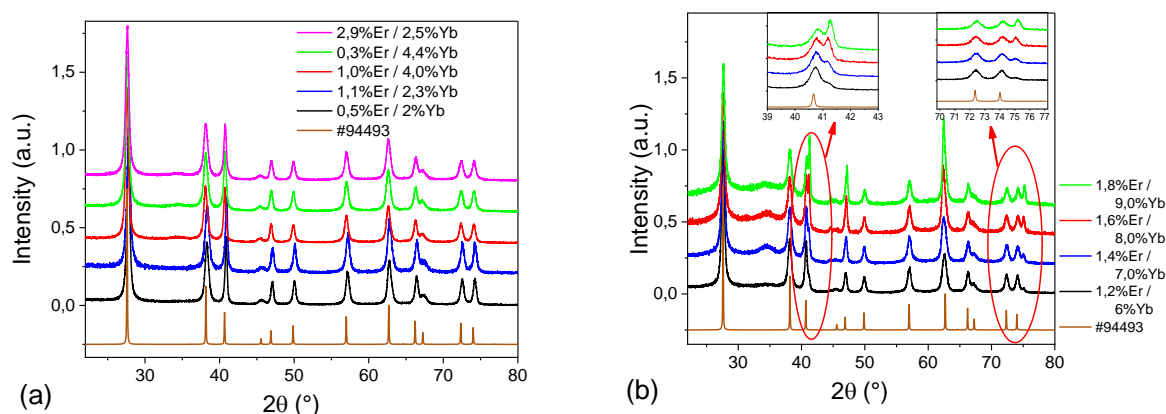

**Fig. S11** X-Ray diffraction profiles of samples prepared at a total lanthanide content varying from 2.4 to 9.8 mol % and for a Yb/Er ratio fixed at 5. (a) XRD phase-pure samples of Table S3 for which the experimental concentrations in  $\text{Er}^{3+}$  and  $\text{Yb}^{3+}$  ions are known. (b) Additional samples prepared with a total lanthanide content above 7.2 mol % for which the chemical analyses have not been performed because of the obvious presence of the same impurity phase already detected in Figures 1a, S2 and S4 when the initial Er content was fixed above 6 mol %.

## References

- 1 D. Sola, A. Miguel, E. Arias-Egido and J. I. Peña, *Applied Sciences*, 2021, **11**, 1137.
- 2 J. J. Ju, T. Y. Kwon, S. I. Yun, M. Cha and H. J. Seo, *Applied Physics Letters*, 1996, **69**, 1358–1360.
- 3 F. Wang and X. Liu, *Chem. Soc. Rev.*, 2009, **38**, 976.
- 4 A. Nadort, J. Zhao and E. M. Goldys, *Nanoscale*, 2016, **8**, 13099–13130.
- 5 E. Cantelar and J. A. Sanz-Garc, *Journal of Crystal Growth*, 1999, **205**, 196–201.
